# Supplementary material for: Impact of Smoking Status on Mortality in STEMI Patients Undergoing Mechanical Reperfusion for STEMI: Insights from the ISACS–STEMI COVID-19 Registry
Source: J Clin Med. 2022 Nov 13;11(22):6722. doi: 10.3390/jcm11226722 (PMC9698021; doi:10.3390/jcm11226722)
Supplement: Supplementary file 1 [file jcm-11-06722-s001.zip › jcm-1879703-supplementary.pdf]

## Supplementary Materials

### Figure Legend:

**Figure S1.** Bar Graphs show the association between smoking status and postprocedural TIMI 3 flow in patients treated in 2019 (precovid era, left graph) and 2020 (covid era, right graph).

**Figure S2.** Bar Graphs show the association between smoking status and postprocedural TIMI 3 flow in young (left graph) and older (right graph) patients.

**Figure S3.** Bar Graphs show the association between smoking status and postprocedural TIMI 3 flow in patients with low (left graph) and high (right graph) propensity score.

**Figure S4.** Bar Graphs show the association between smoking status and in-hospital mortality in patients treated in 2019 (precovid era, left graph) and 2020 (covid era, right graph).

**Figure S5.** Bar Graphs show the association between smoking status and in-hospital mortality in young (left graph) and older (right graph) patients.

**Figure S6.** Bar Graphs show the association between smoking status and in-hospital mortality in patients with low (right graph) and high (left graph) propensity score.

**Figure S7.** Kaplan-Meier survival curves according to smoking status in patients treated in 2019 (left graph) and 2020 (right graph).

**Figure S8.** Kaplan-Meier survival curves according to smoking status in young (left graph) and older (right graph) patients.

**Figure S9.** Kaplan-Meier survival curves according to smoking status in patients with low (left graph) and high (right graph) propensity score.

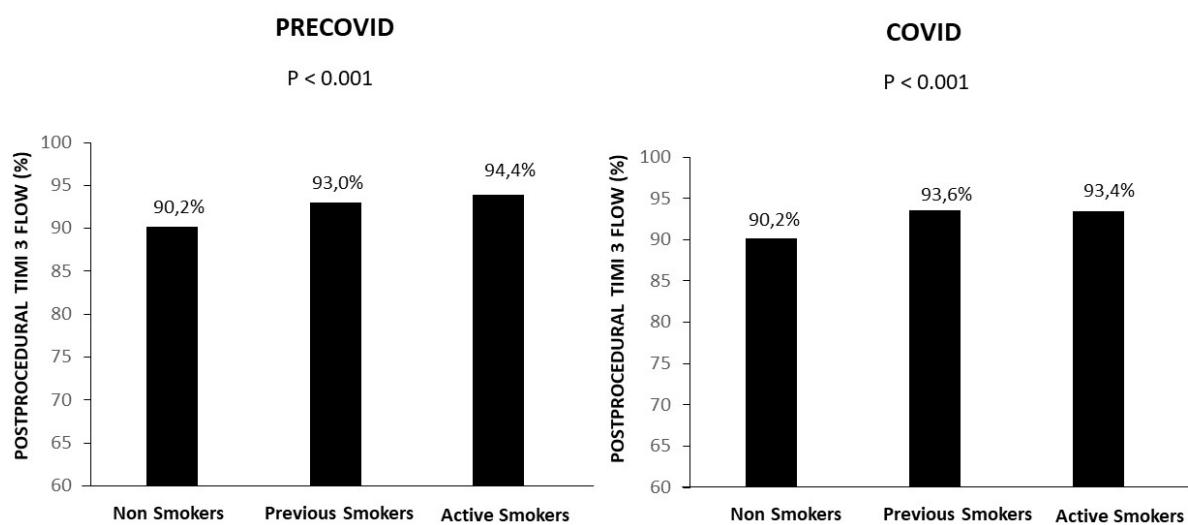

**Figure S1.** Bar Graphs show the association between smoking status and postprocedural TIMI 3 flow in patients treated in 2019 (precovid era, left graph) and 2020 (covid era, right graph).

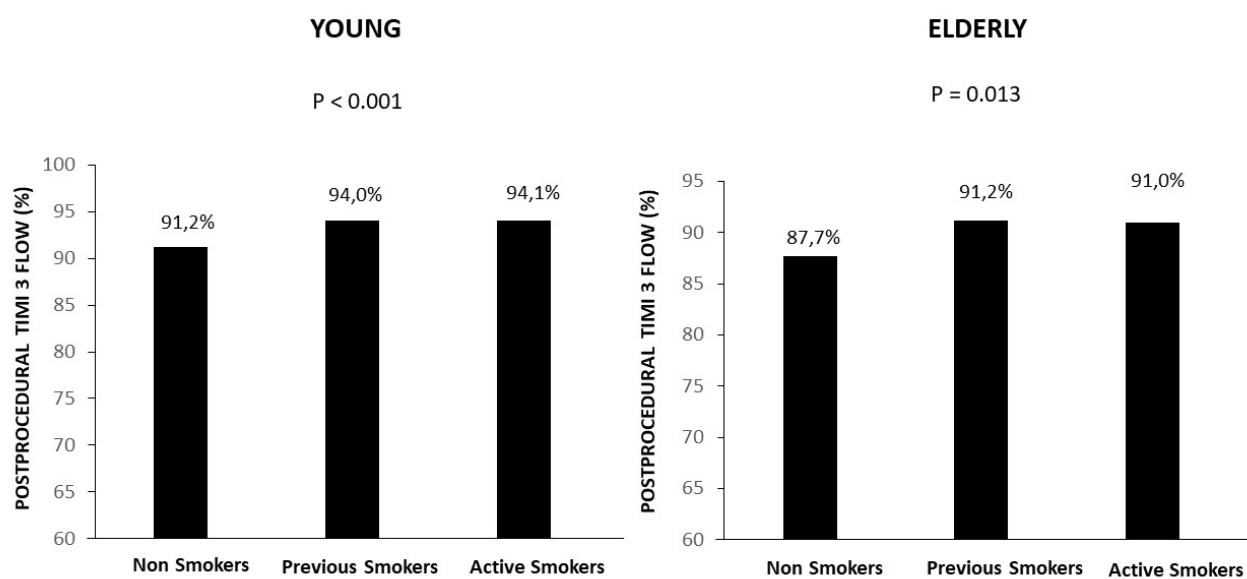

**Figure S2.** Bar Graphs show the association between smoking status and postprocedural TIMI 3 flow in young (left graph) and older (right graph) patients.

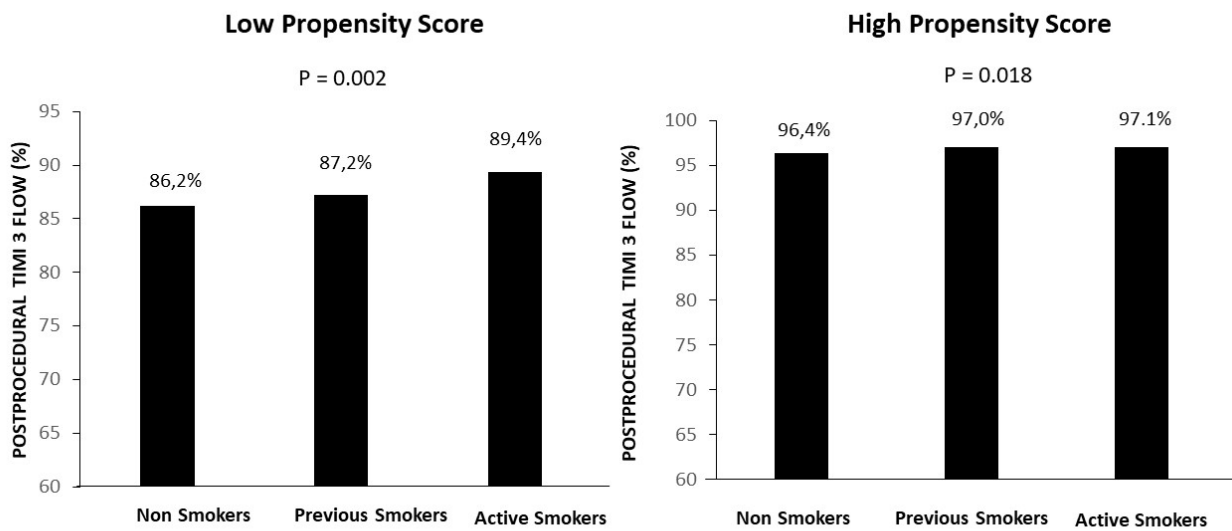

**Figure S3.** Bar Graphs show the association between smoking status and postprocedural TIMI 3 flow in patients with low (left graph) and high (right graph) propensity score.

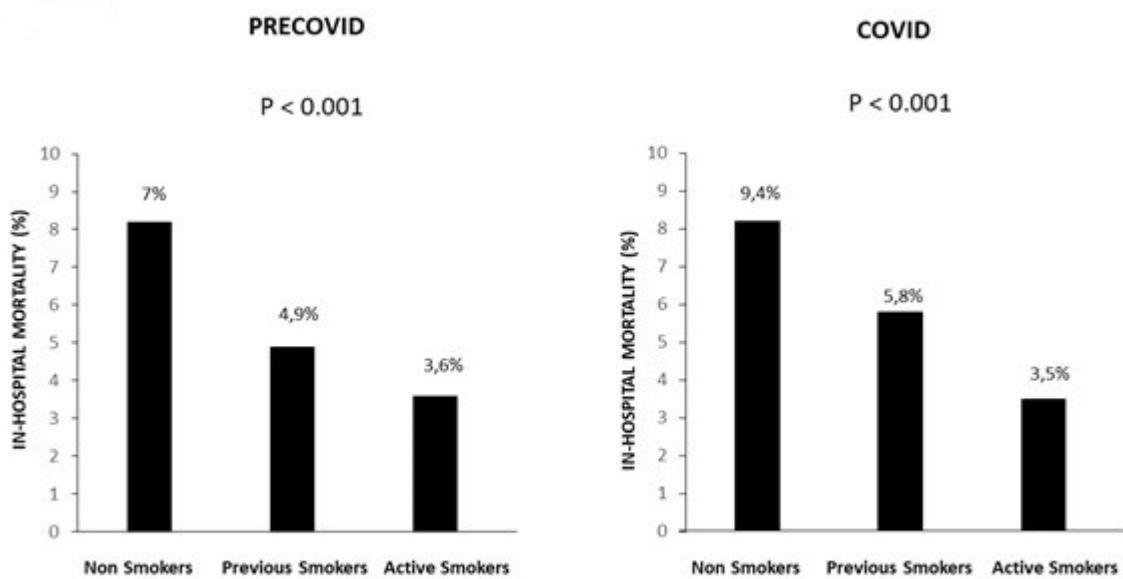

**Figure S4.** Bar Graphs show the association between smoking status and in-hospital mortality in patients treated in 2019 (precovid era, left graph) and 2020 (covid era, right graph).

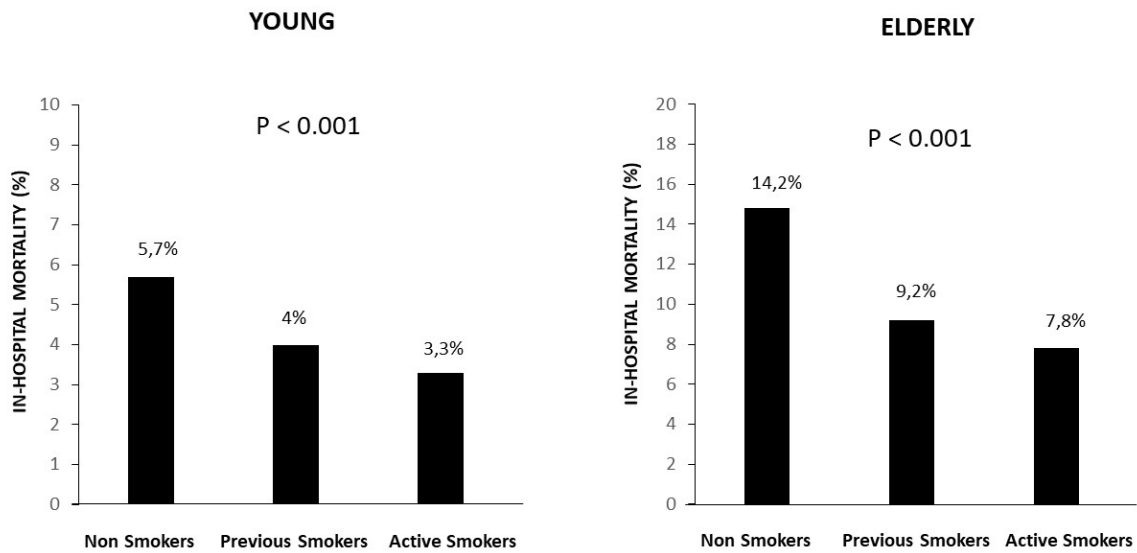

**Figure S5.** Bar Graphs show the association between smoking status and in-hospital mortality in young (left graph) and older (right graph) patients.

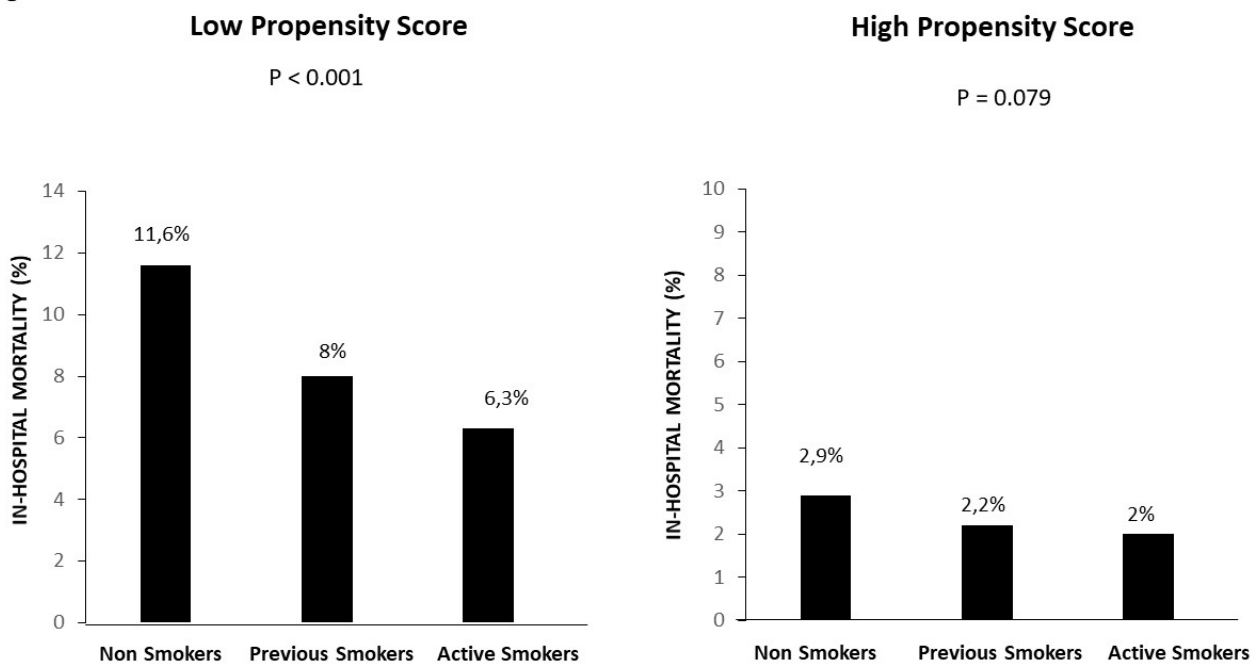

**Figure S6.** Bar Graphs show the association between smoking status and in-hospital mortality in patients with low (right graph) and high (left graph) propensity score.

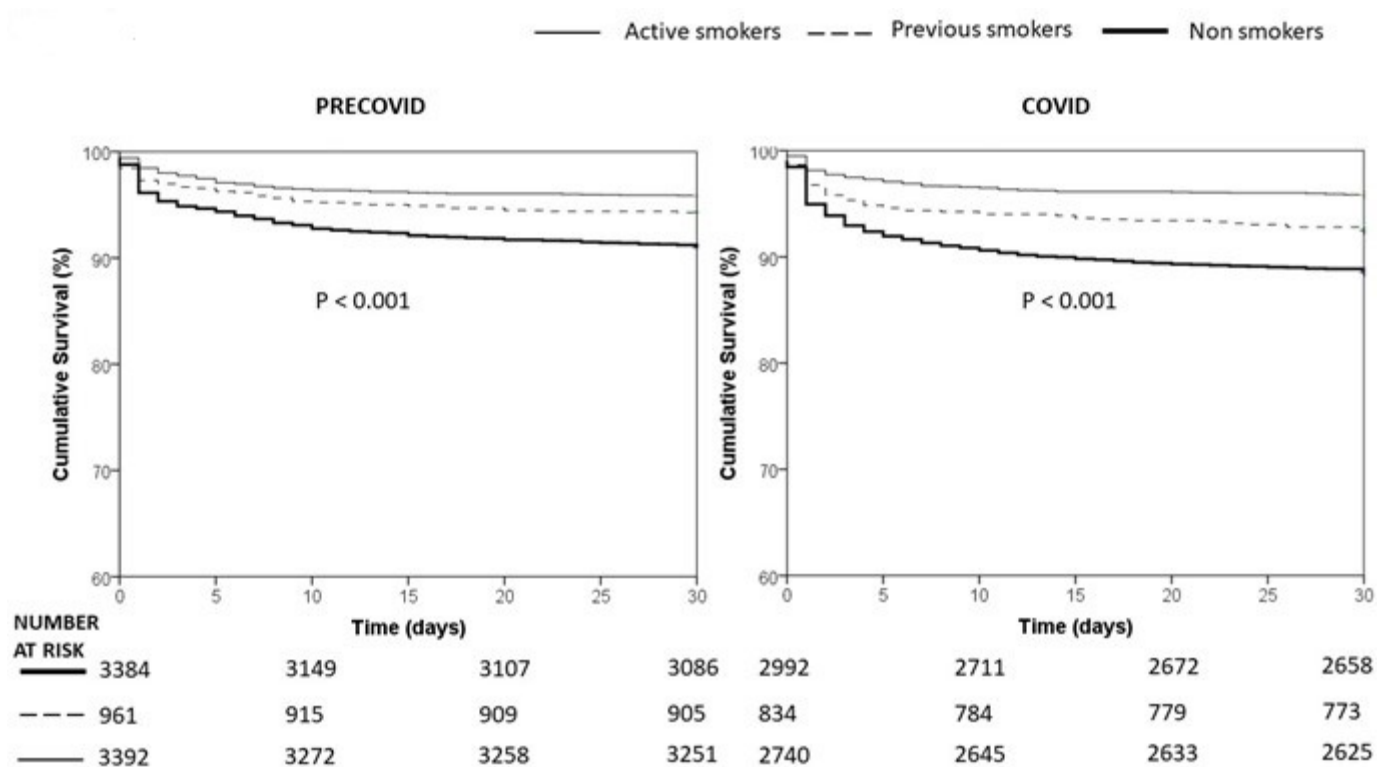

**Figure S7.** Kaplan-Meier survival curves according to smoking status in patients treated in 2019 (left graph) and 2020 (right graph).

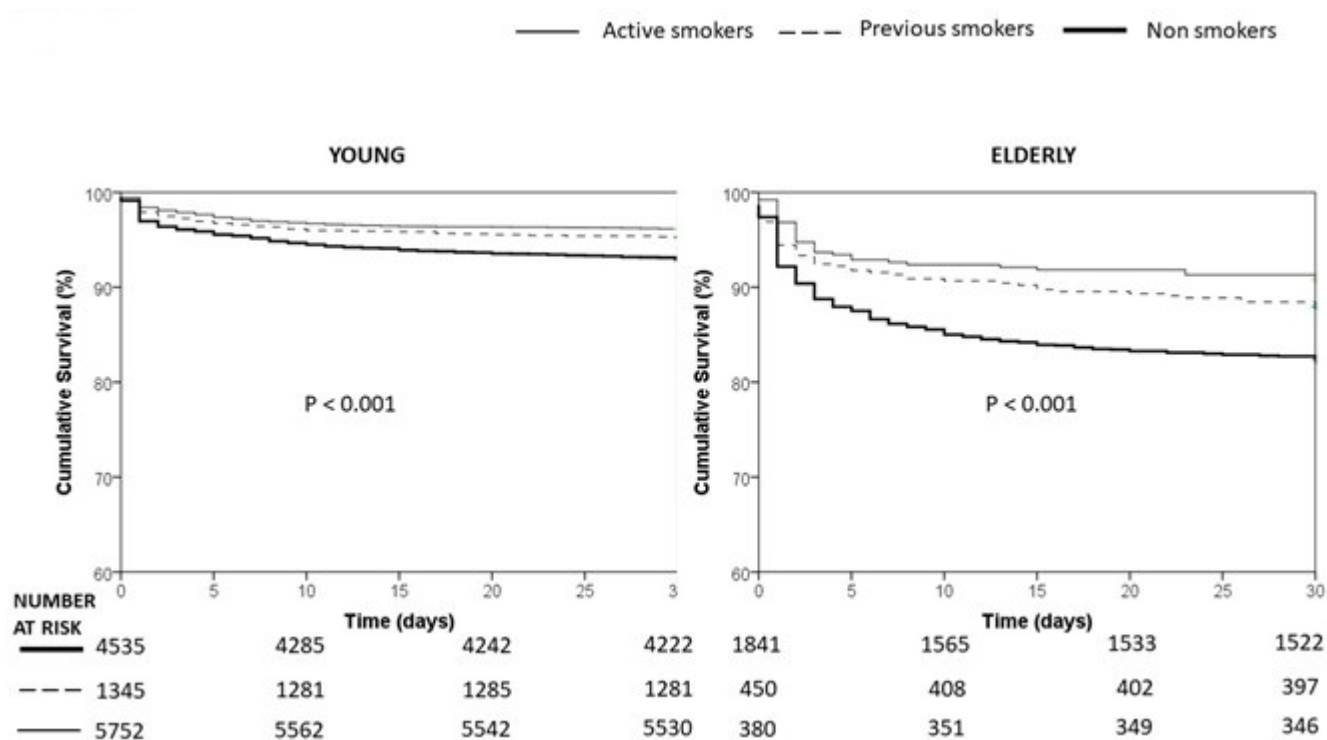

**Figure S8.** Kaplan-Meier survival curves according to smoking status in young (left graph) and older (right graph) patients.

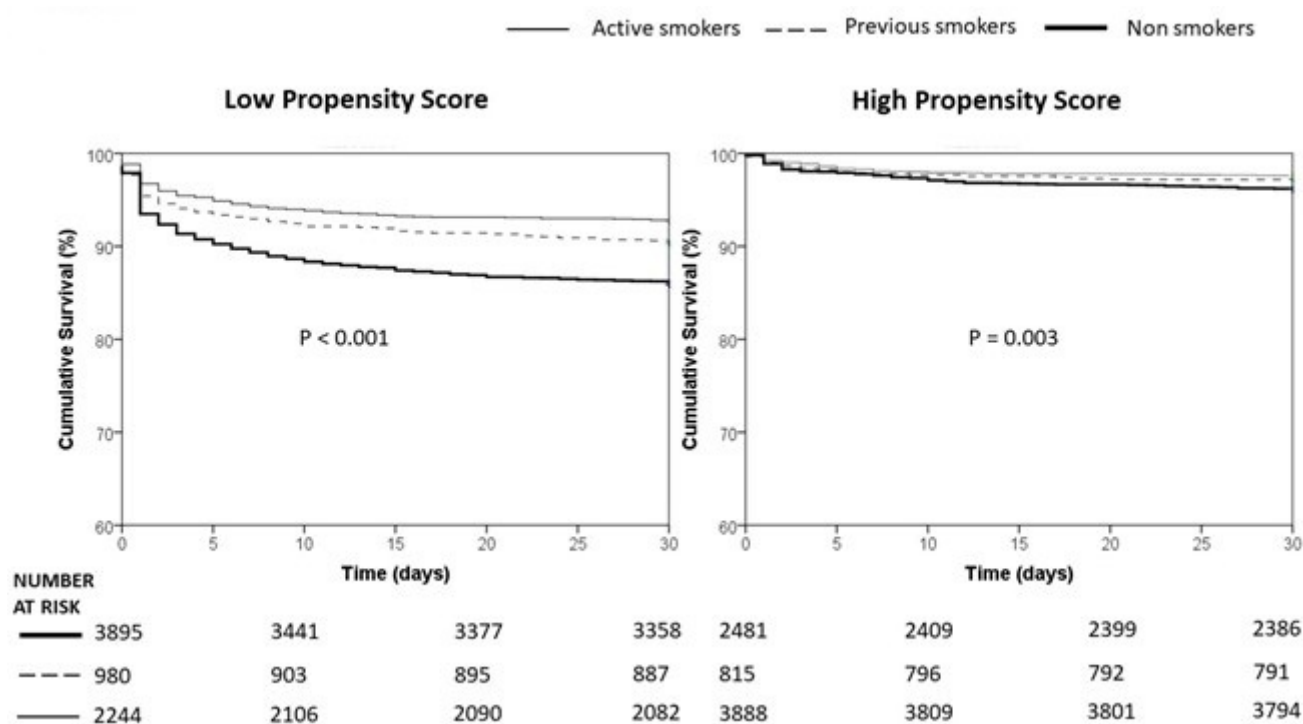

**Figure S9.** Kaplan-Meier survival curves according to smoking status in patients with low (left graph) and high (right graph) propensity score.
